# Supplementary material
Source: PubMed Central journal article supplement (PMC546167)
Supplement: nar_33_1_356__1.pdf [file nar_33_1_356__1.pdf]

Supplementary TABLE. *Hprt* gene mutations of UV-C-exposed *Rev1<sup>B/B</sup>*-254 and Wild type (WT) ES cells

| Position <sup>A</sup>                                | Mutation | 5'-sequence-<br>3' <sup>B</sup> | Amino acid<br>change | # of mutants |                           | Strand <sup>C</sup> |
|------------------------------------------------------|----------|---------------------------------|----------------------|--------------|---------------------------|---------------------|
|                                                      |          |                                 |                      | WT           | <i>Rev1<sup>B/B</sup></i> |                     |
| Single base pair substitutions at dipyrimidine sites |          |                                 |                      |              |                           |                     |
| <i>Transitions</i>                                   |          |                                 |                      |              |                           |                     |
| 74                                                   | GC > AT  | TAC <u>C</u> TAA                | Pro > Leu            | 3            | 1                         | NTS                 |
| 113                                                  | GC > AT  | TTC <u>C</u> TCA                | Pro > Leu            | 3            | 3                         | NTS                 |
| 119                                                  | GC > AT  | ATG <u>G</u> ACT                | Gly > Glu            | 2            |                           | TS                  |
| 145                                                  | GC > AT  | AGAC <u>T</u> TG                | Leu > Phe            | 1            | 1                         | NTS                 |
| 202                                                  | GC > AT  | GTG <u>C</u> TCA                | Leu > Phe            | 1            |                           | NTS                 |
| 208                                                  | GC > AT  | AAG <u>G</u> GGG                | Gly > Arg            | 1            | 1                         | TS                  |
| 325                                                  | GC > AT  | GAT <u>C</u> AGT                | Gln > Stop           | 1            |                           | NTS                 |
| 400                                                  | GC > AT  | GTT <u>G</u> AAG                | Glu > Lys            | 1            | 1                         | TS                  |
| 463                                                  | GC > AT  | AGC <u>C</u> CCA                | Pro > Ser            | 1            |                           | NTS                 |
| 508                                                  | GC > AT  | TCT <u>C</u> GAA                | Arg > Stop           |              | 1                         | NTS                 |
| 527                                                  | GC > AT  | GGC <u>C</u> AGA                | Pro > Leu            | 1            |                           | NTS                 |
| 538                                                  | GC > AT  | GTT <u>G</u> GAT                | Gly > Arg            |              | 2                         | TS                  |
| 539                                                  | GC > AT  | TTG <u>G</u> ATT                | Gly > Glu            |              | 1                         | TS                  |
| 544                                                  | GC > AT  | TTT <u>G</u> AAA                | Glu > Ile            | 1            | 1                         | TS                  |
| 551                                                  | GC > AT  | TTC <u>C</u> AGA                | Pro > Leu            |              | 1                         | NTS                 |
| 599                                                  | GC > AT  | TCAG <u>G</u> GA                | Arg > Lys            | 5            | 2                         | TS                  |
| 601                                                  | GC > AT  | AGG <u>G</u> ATT                | Asp > Asn            | 3            | 3                         | TS                  |
| 635                                                  | GC > AT  | CTG <u>G</u> AAA                | Gly > Glu            | 5            | 2                         | TS                  |
| 7                                                    | AT > GC  | CCG <u>A</u> CCC                | Thr > Ala            | 1            |                           | TS                  |
| 146                                                  | AT > GC  | GACT <u>T</u> GC                | Leu > Pro            | 1            |                           | NTS                 |
| 440                                                  | AT > GC  | TGCT <u>T</u> TC                | Leu > Pro            | 1            |                           | NTS                 |
| <i>Transversions</i>                                 |          |                                 |                      |              |                           |                     |
| 544                                                  | GC > TA  | TTT <u>G</u> AAA                | Glu > Stop           | 1            |                           | TS                  |
| 550                                                  | GC > TA  | ATT <u>C</u> CAG                | Pro > Thr            | 1            |                           | NTS                 |
| 29                                                   | AT > TA  | TGAT <u>T</u> AG                | Ile > Asn            | 1            |                           | NTS                 |
| 62                                                   | AT > TA  | ATT <u>T</u> GTT                | Leu > Stop           | 1            |                           | NTS                 |
| 125                                                  | AT > TA  | TGAT <u>T</u> AT                | Ile > Asn            | 1            |                           | NTS                 |
| 374                                                  | AT > TA  | CTT <u>T</u> AAC                | Leu > Stop           | 3            |                           | NTS                 |
| 548                                                  | AT > TA  | AAAT <u>T</u> CC                | Ile > Asn            | 1            |                           | NTS                 |
| 637                                                  | AT > TA  | GGAA <u>A</u> AG                | Lys > Stop           | 1            |                           | TS                  |
| 643                                                  | AT > TA  | GCC <u>A</u> AAT                | Lys > Stop           | 1            |                           | TS                  |
| 656                                                  | AT > TA  | CCTA <u>A</u> GA                | Stop > Leu           | 1            |                           | TS                  |
| 487                                                  | AT > CG  | AGCT <u>T</u> GC                | Leu > Val            | 1            |                           | NTS                 |
| Double base pair substitutions at dipyrimidine sites |          |                                 |                      |              |                           |                     |
| 196/197                                              | AT > TA  | CTCT <u>G</u> TGT               | Cys > Ser            |              | 1                         | NTS                 |
|                                                      | GC > TA  |                                 | Cys > Phe            |              |                           | NTS                 |
| 211/212                                              | GC > TA  | GGG <u>G</u> GCTA               | Gly > Cys            |              | 1                         | TS                  |

|                                                          |         |                   |            |    |    |     |
|----------------------------------------------------------|---------|-------------------|------------|----|----|-----|
|                                                          | GC > AT |                   | Gly > Asp  |    |    | TS  |
| 382/384                                                  | AT > GC | GGAA <u>AG</u> AA | Lys > Glu  | 1  |    | TS  |
|                                                          | GC > AT |                   | no change  |    |    | TS  |
| 568/569                                                  | GC > AT | GTTGGATA          | Gly > Arg  | 1  |    | TS  |
|                                                          | GC > AT |                   | Gly > Glu  |    |    | TS  |
| 569/570                                                  | GC > AT | TTGGATAT          | Gly > Glu  |    | 1  | TS  |
|                                                          | AT > TA |                   | no change  |    |    | TS  |
| 569/571                                                  | GC > AT | TTGGATAT          | Gly > Glu  |    | 1  | TS  |
|                                                          | AT > TA |                   | Tyr > Asn  |    |    | TS  |
| 580/582                                                  | GC > AT | CTTGACTA          | Asp > Asn  |    | 1  | TS  |
|                                                          | GC > TA |                   | Asp > Glu  |    |    | NTS |
| 600/601                                                  | GC > AT | CAGGGGAT          | no change  | 1  | 1  | TS  |
|                                                          | GC > AT |                   | Asp > Asn  |    |    | TS  |
| 601/603                                                  | GC > AT | AGGGATTT          | Asp > Asn  | 1  |    | TS  |
|                                                          | AT > TA |                   | Asp > Glu  |    |    | NTS |
| 632/634                                                  | GC > AT | AAACTGGA          | Thr > Ile  | 1  |    | NTS |
|                                                          | GC > TA |                   | Gly > Stop |    |    | TS  |
| Single base pair substitutions at non-dipyrimidine sites |         |                   |            |    |    |     |
| <i>Transversions</i>                                     |         |                   |            |    |    |     |
| 584                                                      | AT > CG | ACTATAA           | Tyr > Ser  |    | 1  |     |
| 611                                                      | AT > TA | ATCACGT           | His > Leu  |    | 1  |     |
| 617                                                      | GC > TA | TTTGTGT           | Cys > Phe  |    | 1  |     |
| Frameshift mutation                                      |         |                   |            |    |    |     |
| 472                                                      | +T      | TGG-TTA           |            |    | 1  |     |
| Double basepair substitutions at non-dipyrimidine sites  |         |                   |            |    |    |     |
| 183/185                                                  | GC > AT | TCACATTG          | No change  | 1  |    |     |
|                                                          | -T      |                   |            |    |    |     |
| 406/407                                                  | AT > TA | GATATAAT          | Ile > Leu  |    | 1  |     |
|                                                          | AT > TA |                   | Ile > Lys  |    |    |     |
| Others                                                   |         |                   |            |    |    |     |
| Splice <sup>D</sup>                                      |         |                   |            | 28 | 30 |     |
| No <i>Hprt</i>                                           |         |                   |            |    | 8  |     |
| PCR                                                      |         |                   |            |    |    |     |
| No                                                       |         |                   |            | 2  | 1  |     |
| mutation                                                 |         |                   |            |    |    |     |

<sup>A</sup> Position 1 at adenine of the translational start codon ATG.

<sup>B</sup> Non-transcribed strand. Nucleotide with underscore is affected.

<sup>C</sup> Pyrimidine dimer-containing strand. NTS, non-transcribed strand; TS, transcribed strand.

<sup>D</sup> Mutants lacking one or more exons in the *Hprt* mRNA, probably due to mutations affecting correct splicing
